# Supplementary material
Source: PubMed Central journal article supplement (PMC2774542)
Supplement: blood-2009-03-209601_1.pdf [file blood-2009-03-209601_1.pdf]

|                                | Absolute Exposures                                 |                                                     |
|--------------------------------|----------------------------------------------------|-----------------------------------------------------|
|                                | Control (proxy response) vs.<br>Case (self-report) | Case (proxy response ) vs.<br>Control (self-report) |
|                                | kappa (95% CI)                                     | kappa (95% CI)                                      |
| Infectious Mononucleosis       | 0.7 (0.4, 0.9)                                     | 0.8 (0.6, 1.0)                                      |
| Cold Sores                     | 0.6 (0.4, 0.9)                                     | 0.8 (0.6, 0.9)                                      |
| Tonsillectomy                  | 1.0 (0.9, 1.0)                                     | 0.9 (0.8, 1.0)                                      |
| Appendectomy                   | 1.0 (1.0, 1.0)                                     | 0.8 (0.5, 1.0)                                      |
| Eczema                         | 0.8 (0.5, 1.0)                                     | 0.8 (0.6, 1.0)                                      |
| Smoking (ever/never)           | 0.8 (0.7, 0.9)                                     | 0.9 (0.8, 1.0)                                      |
|                                | Relative Exposures                                 |                                                     |
|                                | kappa (95% CI)                                     |                                                     |
| Who sucked thumb more?         | 0.9 (0.8, 1.0)                                     |                                                     |
| Who put things in mouth more?  | 0.9 (0.8, 1.0)                                     |                                                     |
| Who bit their nails more?      | 0.7 (0.6, 0.8)                                     |                                                     |
| Who kissed more people?        | 0.7 (0.6, 0.9)                                     |                                                     |
| Who spent more time with pets? | 0.7 (0.6, 0.8)                                     |                                                     |
